# Supplementary material for: Theoretical design of highly energetic poly-nitro cage compounds
Source: Royal Society of Chemistry journal article supplement (doi:10.1039/c6ra05352a), 2016-01-01
Supplement: c6ra05352a1.pdf [file c6ra05352a1.pdf]

**Supporting Information**

for

**Theoretical design of highly energetic poly-nitro cage  
compounds**

Meng Tian, Wei-Jie Chi, Quan-Song Li,\*Ze-Sheng Li \*

*Beijing Key Laboratory of Photoelectronic/Electrophotonic Conversion Materials,  
Key Laboratory of Cluster Science of Ministry of Education, Beijing Key Laboratory  
for Chemical Power Source and Green Catalysis, School of Chemistry, Beijing  
Institute of Technology, Beijing 100081, China*

Corresponding Authors:

\* E-mail: liquansong@bit.edu.cn (Q.S. Li), zeshengli@bit.edu.cn (Z. S. Li)

**Table S1** Optimized coordinates of ONOP at B3LYP/6-31G (d, p) level.

| Atom | X           | Y           | Z           |
|------|-------------|-------------|-------------|
| C    | -1.95058400 | -0.66823100 | -0.76275200 |
| C    | -0.89529300 | -1.81867000 | -0.80680200 |
| C    | 0.65242800  | -1.91574300 | -0.81397300 |
| C    | 1.80840400  | -0.87978200 | -0.79931200 |
| C    | 1.94729700  | 0.67558600  | -0.75638500 |
| C    | 0.88154700  | 1.81513300  | -0.78817400 |
| C    | -0.66509000 | 1.91472400  | -0.75264800 |
| C    | -1.82859300 | 0.87171700  | -0.76261400 |
| C    | -0.65483600 | 1.89242500  | 0.80211000  |
| C    | 0.90622900  | 1.83644800  | 0.77503400  |
| C    | 1.90605200  | 0.63825200  | 0.80761400  |
| C    | 1.81857100  | -0.90834700 | 0.75385000  |
| C    | 0.64435500  | -1.93662600 | 0.75098100  |
| C    | -0.89958300 | -1.86098700 | 0.75744000  |
| C    | -1.90816700 | -0.68661100 | 0.79361900  |
| C    | -1.82708300 | 0.87779900  | 0.79627600  |
| N    | -1.51814300 | -3.01383700 | -1.52747800 |
| O    | -0.86841800 | -3.57541600 | -2.39675600 |
| O    | -2.65047600 | -3.31224700 | -1.16165800 |
| N    | 3.04236000  | -1.44413000 | -1.50238600 |

---

|   |             |             |             |
|---|-------------|-------------|-------------|
| O | 2.87833200  | -2.24792100 | -2.40681600 |
| O | 4.11666300  | -1.01081600 | -1.09938100 |
| N | 1.45934100  | 3.00837100  | -1.56672500 |
| O | 0.73535300  | 3.56209800  | -2.38290200 |
| O | 2.62149100  | 3.29803300  | -1.32076500 |
| N | -3.02634700 | 1.50696400  | -1.46168300 |
| O | -3.54932200 | 0.89391200  | -2.37998400 |
| O | -3.34969000 | 2.61392900  | -1.04596100 |
| N | -1.06510400 | 3.17657600  | 1.51939900  |
| O | -1.86447700 | 3.09355100  | 2.43954300  |
| O | -0.52042600 | 4.19834800  | 1.11681200  |
| N | -3.19143900 | -1.09437200 | 1.51186900  |
| O | -3.11887100 | -1.93377200 | 2.39587000  |
| O | -4.20575900 | -0.51382800 | 1.13968700  |
| N | 1.13151700  | -3.22251500 | 1.42031000  |
| O | 2.23167300  | -3.62032100 | 1.05066000  |
| O | 0.41427000  | -3.75451300 | 2.25427300  |
| N | 3.15147900  | 1.05754000  | 1.60801200  |
| O | 3.61400100  | 0.25487900  | 2.40710800  |
| O | 3.57366700  | 2.18507300  | 1.39434600  |
| H | 2.87183900  | 1.01085300  | -1.22344300 |
| H | 2.69621600  | -1.32595500 | 1.24323300  |

---

---

|   |             |             |             |
|---|-------------|-------------|-------------|
| H | -1.32228600 | -2.72250100 | 1.27374900  |
| H | -2.68541000 | 1.30883300  | 1.30861900  |
| H | -0.96901100 | 2.83794800  | -1.24281400 |
| H | 1.35147200  | 2.70759000  | 1.25292900  |
| H | 0.96766500  | -2.80160500 | -1.36487500 |
| H | -2.87417700 | -0.96777900 | -1.25480800 |

---

**Table S2** Optimized coordinates of ONOAP at B3LYP/6-31G (d, p) level.

| Atom | X           | Y           | Z           |
|------|-------------|-------------|-------------|
| C    | 0.70774800  | 1.76787700  | 0.72546600  |
| C    | 1.76787700  | -0.70774800 | 0.72546600  |
| C    | -0.70774800 | -1.76787700 | 0.72546600  |
| C    | -1.76787700 | 0.70774800  | 0.72546600  |
| C    | -1.75053100 | -0.74962400 | -0.72546600 |
| C    | 0.74962400  | -1.75053100 | -0.72546600 |
| C    | 1.75053100  | 0.74962400  | -0.72546600 |
| C    | -0.74962400 | 1.75053100  | -0.72546600 |
| N    | 1.19424800  | 2.97122300  | 1.53032400  |
| O    | 1.08539700  | 2.79897100  | 2.73220100  |
| O    | 1.62577800  | 3.92497500  | 0.91514800  |
| N    | 2.97122300  | -1.19424800 | 1.53032400  |
| O    | 2.79897100  | -1.08539700 | 2.73220100  |
| O    | 3.92497500  | -1.62577800 | 0.91514800  |
| N    | -1.19424800 | -2.97122300 | 1.53032400  |
| O    | -1.08539700 | -2.79897100 | 2.73220100  |
| O    | -1.62577800 | -3.92497500 | 0.91514800  |
| N    | -2.97122300 | 1.19424800  | 1.53032400  |
| O    | -2.79897100 | 1.08539700  | 2.73220100  |
| O    | -3.92497500 | 1.62577800  | 0.91514800  |

---

|   |             |             |             |
|---|-------------|-------------|-------------|
| N | -2.94543200 | -1.25651100 | -1.53032400 |
| O | -2.74666300 | -1.21168000 | -2.73220100 |
| O | -3.92497500 | -1.62577800 | -0.91514800 |
| N | -1.25651100 | 2.94543200  | -1.53032400 |
| O | -1.21168000 | 2.74666300  | -2.73220100 |
| O | -1.62577800 | 3.92497500  | -0.91514800 |
| N | 2.94543200  | 1.25651100  | -1.53032400 |
| O | 3.92497500  | 1.62577800  | -0.91514800 |
| O | 2.74666300  | 1.21168000  | -2.73220100 |
| N | 1.25651100  | -2.94543200 | -1.53032400 |
| O | 1.21168000  | -2.74666300 | -2.73220100 |
| O | 1.62577800  | -3.92497500 | -0.91514800 |
| N | -0.71935800 | -1.79592100 | -0.76100700 |
| N | 0.76124500  | -1.77857100 | 0.76100700  |
| N | -0.76124500 | 1.77857100  | 0.76100700  |
| N | 1.79592100  | -0.71935800 | -0.76100700 |
| N | 0.71935800  | 1.79592100  | -0.76100700 |
| N | -1.79592100 | 0.71935800  | -0.76100700 |
| N | -1.77857100 | -0.76124500 | 0.76100700  |
| N | 1.77857100  | 0.76124500  | 0.76100700  |

---

**Table S3** Optimized coordinates of TNOP at B3LYP/6-31G (d, p) level.

| Atom | X           | Y           | Z           |
|------|-------------|-------------|-------------|
| C    | -1.95058400 | -0.66823100 | -0.76275200 |
| C    | -0.89529300 | -1.81867000 | -0.80680200 |
| C    | 0.65242800  | -1.91574300 | -0.81397300 |
| C    | 1.94729700  | 0.67558600  | -0.75638500 |
| C    | 0.88154700  | 1.81513300  | -0.78817400 |
| C    | -0.66509000 | 1.91472400  | -0.75264800 |
| C    | 0.90622900  | 1.83644800  | 0.77503400  |
| C    | 1.90605200  | 0.63825200  | 0.80761400  |
| C    | 1.81857100  | -0.90834700 | 0.75385000  |
| C    | -0.89958300 | -1.86098700 | 0.75744000  |
| C    | -1.90816700 | -0.68661100 | 0.79361900  |
| C    | -1.82708300 | 0.87779900  | 0.79627600  |
| N    | -1.51814300 | -3.01383700 | -1.52747800 |
| O    | -0.86841800 | -3.57541600 | -2.39675600 |
| O    | -2.65047600 | -3.31224700 | -1.16165800 |
| N    | 1.45934100  | 3.00837100  | -1.56672500 |
| O    | 0.73535300  | 3.56209800  | -2.38290200 |
| O    | 2.62149100  | 3.29803300  | -1.32076500 |
| N    | -3.19143900 | -1.09437200 | 1.51186900  |
| O    | -3.11887100 | -1.93377200 | 2.39587000  |
| O    | -4.20575900 | -0.51382800 | 1.13968700  |
| N    | 3.15147900  | 1.05754000  | 1.60801200  |
| O    | 3.61400100  | 0.25487900  | 2.40710800  |
| O    | 3.57366700  | 2.18507300  | 1.39434600  |
| H    | 2.87183900  | 1.01085300  | -1.22344300 |
| H    | 2.69621600  | -1.32595500 | 1.24323300  |
| H    | -1.32228600 | -2.72250100 | 1.27374900  |
| H    | -2.68541000 | 1.30883300  | 1.30861900  |
| H    | -0.96901100 | 2.83794800  | -1.24281400 |
| H    | 1.35147200  | 2.70759000  | 1.25292900  |
| H    | 0.96766500  | -2.80160500 | -1.36487500 |
| H    | -2.87417700 | -0.96777900 | -1.25480800 |
| C    | -1.82859300 | 0.87171700  | -0.76261400 |
| H    | -2.40188269 | 1.14151372  | -1.62484869 |
| C    | 1.80840400  | -0.87978200 | -0.79931200 |
| H    | 2.36434729  | -1.15078836 | -1.67245724 |
| C    | 0.64435500  | -1.93662600 | 0.75098100  |
| H    | 0.84244879  | -2.55273693 | 1.60307617  |
| C    | -0.65483600 | 1.89242500  | 0.80211000  |
| H    | -0.86365011 | 2.47066353  | 1.67785932  |

**Table S4** Optimized coordinates of TNOAP at B3LYP/6-31G (d, p) level.

| Atom | X           | Y           | Z           |
|------|-------------|-------------|-------------|
| C    | 0.70774800  | 1.76787700  | 0.72546600  |
| C    | -0.70774800 | -1.76787700 | 0.72546600  |
| C    | -1.75053100 | -0.74962400 | -0.72546600 |
| C    | 1.75053100  | 0.74962400  | -0.72546600 |
| N    | 1.19424800  | 2.97122300  | 1.53032400  |
| O    | 1.08539700  | 2.79897100  | 2.73220100  |
| O    | 1.62577800  | 3.92497500  | 0.91514800  |
| N    | -1.19424800 | -2.97122300 | 1.53032400  |
| O    | -1.08539700 | -2.79897100 | 2.73220100  |
| O    | -1.62577800 | -3.92497500 | 0.91514800  |
| N    | -2.94543200 | -1.25651100 | -1.53032400 |
| O    | -2.74666300 | -1.21168000 | -2.73220100 |
| O    | -3.92497500 | -1.62577800 | -0.91514800 |
| N    | 2.94543200  | 1.25651100  | -1.53032400 |
| O    | 3.92497500  | 1.62577800  | -0.91514800 |
| O    | 2.74666300  | 1.21168000  | -2.73220100 |
| N    | -0.71935800 | -1.79592100 | -0.76100700 |
| N    | 0.76124500  | -1.77857100 | 0.76100700  |
| N    | -0.76124500 | 1.77857100  | 0.76100700  |
| N    | 1.79592100  | -0.71935800 | -0.76100700 |
| N    | 0.71935800  | 1.79592100  | -0.76100700 |
| N    | -1.79592100 | 0.71935800  | -0.76100700 |
| N    | -1.77857100 | -0.76124500 | 0.76100700  |
| N    | 1.77857100  | 0.76124500  | 0.76100700  |
| C    | 0.74962400  | -1.75053100 | -0.72546600 |
| H    | 0.99985674  | -2.33355100 | -1.58707569 |
| C    | -0.74962400 | 1.75053100  | -0.72546600 |
| H    | -0.99985674 | 2.33355040  | -1.58707609 |
| C    | -1.76787700 | 0.70774800  | 0.72546600  |
| H    | -2.35707598 | 0.94306334  | 1.58707569  |
| C    | 1.76787700  | -0.70774800 | 0.72546600  |
| H    | 2.35707598  | -0.94306416 | 1.58707546  |



**Table S5** The identity and the quantity of the gas products of decomposition of the target compounds.

| Compd | Formula                                                       | Quantity of decomposition products (mol) |                  |    |      |                     |
|-------|---------------------------------------------------------------|------------------------------------------|------------------|----|------|---------------------|
|       |                                                               | N <sub>2</sub>                           | H <sub>2</sub> O | CO | C(s) | V(dm <sup>3</sup> ) |
| ONOP  | C <sub>16</sub> H <sub>8</sub> N <sub>8</sub> O <sub>16</sub> | 4                                        | 4                | 12 | 4    | 448.0               |
| ONOAP | C <sub>8</sub> N <sub>16</sub> O <sub>16</sub>                | 8                                        | 0                | 8  | 0    | 358.4               |
| TNOP  | C <sub>16</sub> H <sub>12</sub> N <sub>4</sub> O <sub>8</sub> | 2                                        | 6                | 2  | 14   | 224.0               |
| TNOAP | C <sub>8</sub> H <sub>4</sub> N <sub>12</sub> O <sub>8</sub>  | 6                                        | 2                | 6  | 2    | 313.6               |

**Table S6** Corresponding parameters for the calculations of  $I_s$  for the designed compounds.

| Compd        | $n$  | $N$    | $M$ | $C_{P,gases}(J(mol*K)^{-1})$ | $T_c$   | $\Delta H_{comb}(kJmol^{-1})$ |
|--------------|------|--------|-----|------------------------------|---------|-------------------------------|
| ONOP         | 14.0 | 0.0246 | 568 | 559.96                       | 17176.7 | -9451.45                      |
| ONOAP        | 16.0 | 0.0278 | 576 | 532.08                       | 13777.9 | -7172.39                      |
| <b>TNOP</b>  | 9.0  | 0.0232 | 388 | 423.30                       | 22680.0 | -9474.28                      |
| <b>TNOAP</b> | 11.0 | 0.0278 | 396 | 395.42                       | 17597.5 | -6840.59                      |
| HMX          | 10.0 | 0.0338 | 296 | 340.88                       | 6166.5  | -2000.00                      |

Note:  $C_{P,gases}(kJ(mol*k)^{-1})$ : H<sub>2</sub>O, 33.33; CO<sub>2</sub>, 37.65; N<sub>2</sub>, 28.86; C, 8.53.

$\Delta H_f(kJ mol^{-1})$ : H<sub>2</sub>O, -241.83; CO<sub>2</sub>, -393.51; N<sub>2</sub>, 0; C, 0
